# Supplementary material for: Metallic impurities in black phosphorus nanoflakes prepared by different synthetic routes
Source: Royal Society of Chemistry journal article supplement (doi:10.1039/c7nr05718k), 2018-01-01
Supplement: c7nr05718k1.pdf [file c7nr05718k1.pdf]

## Supporting Information

# Metallic Impurities in Black Phosphorus Nanoflakes Prepared by Different Synthetic Routes

*Carmen C. Mayorga-Martinez,<sup>a</sup> Zdeněk Sofer,<sup>b</sup> David Sedmidubský,<sup>b</sup> Jan Luxa,<sup>b</sup> Bahareh Kherzi,<sup>a</sup> Martin Pumera<sup>\*a</sup>*

<sup>a</sup>Division of Chemistry & Biological Chemistry, School of Physical Mathematical Science,  
Nanyang Technological University, Singapore 637371, Singapore

<sup>b</sup>Department of Inorganic Chemistry University of Chemistry and Technology Prague  
Technická 5, 166

28 Prague 6, Czech Republic

\*Corresponding author: [pumera.research@gmail.com](mailto:pumera.research@gmail.com)

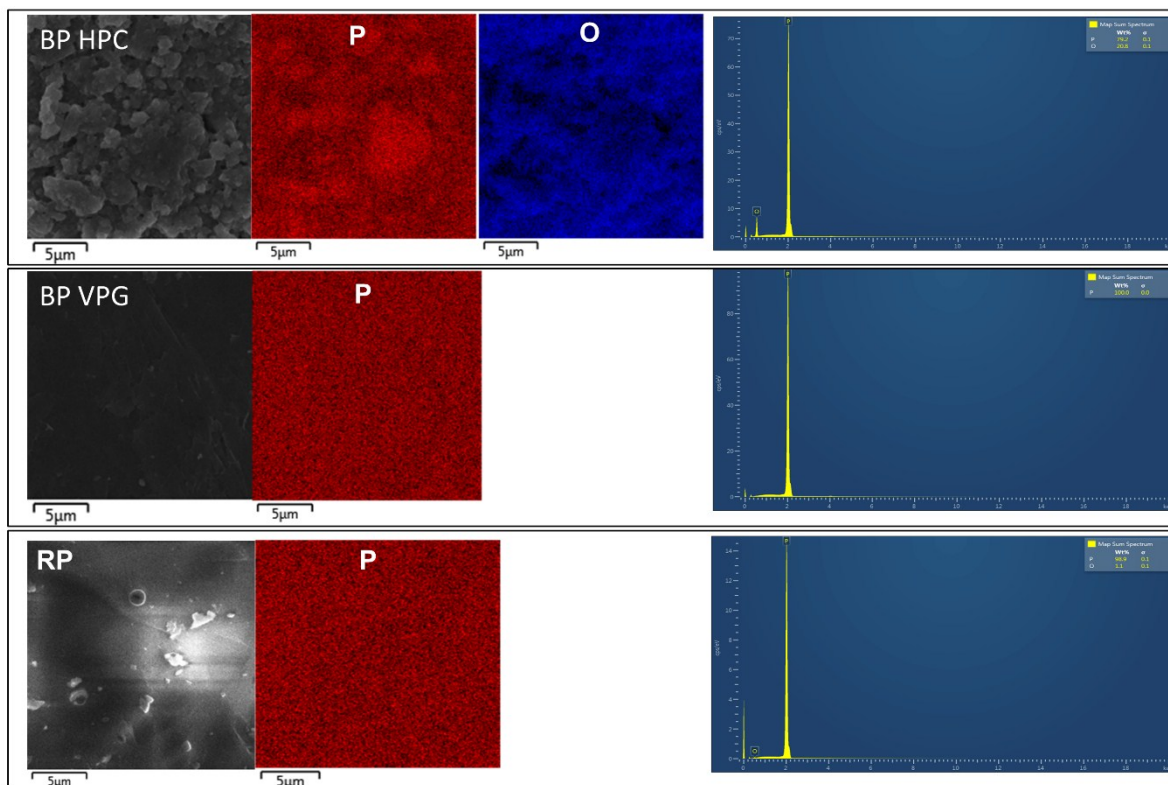

Figure S1. SEM-EDX mapping and energy-dispersive X-ray (EDX) spectroscopy of BP HPC, BP VPG and commercial RP.
